# Supplementary material for: Rearrangement of a Ge(ii) aryloxide to yield a new Ge(ii) oxo-cluster [Ge6(μ3-O)4(μ2-OC6H2-2,4,6-Cy3)4](NH3)0.5: main group aryloxides of Ge(ii), Sn(ii), and Pb(ii) [M(OC6H2-2,4,6-Cy3)2]2 (Cy = cyclohexyl)
Source: Royal Society of Chemistry journal article supplement (doi:10.1039/d3dt00906h), 2023-01-01
Supplement: d3dt00906h1.pdf [file d3dt00906h1.pdf]

# Rearrangement of a Ge(II) Aryloxy to Yield a New Ge(II) Oxo-Cluster $[\text{Ge}_6(\mu_3\text{-O})_4(\mu_2\text{-OC}_6\text{H}_2\text{-2,4,6-Cy}_3)_4](\text{NH}_3)_{0.5}$ : Main Group Aryloxides of Ge(II), Sn(II), and Pb(II) $[\text{M}(\text{OC}_6\text{H}_2\text{-2,4,6-Cy}_3)_2]_2$ (Cy=Cyclohexyl)

Connor P. McLoughlin,<sup>a</sup> Derrick C. Kaseman,<sup>b,c</sup> James C. Fettingler,<sup>a</sup> and Philip P. Power<sup>a\*</sup>

<sup>a</sup>Department of Chemistry, University of California, One Shields Avenue, Davis, California 95616, United States

<sup>b</sup>Nuclear Magnetic Resonance Facility, University of California, One Shields Avenue, Davis, California 95616, United States

<sup>c</sup>Biochemistry and Biotechnology Group, Los Alamos National Laboratory, Los Alamos, New Mexico 87545, United States

## Supporting Information

### Table of Contents:

|                                                                                          |       |
|------------------------------------------------------------------------------------------|-------|
| 1. Characterization data for complex <b>1</b> .....                                      | S3    |
| Figure S1. <sup>1</sup> H NMR spectrum of <b>1</b> .....                                 | S3    |
| Figure S2. Infrared spectrum of <b>1</b> .....                                           | S3    |
| Figure S3. UV-Vis spectrum (73 μM) of <b>1</b> .....                                     | S4    |
| 2. Characterization data for complex <b>2</b> .....                                      | S4    |
| Figure S4. <sup>1</sup> H NMR spectrum of <b>2</b> .....                                 | S4    |
| Figures S5-S7. VT- <sup>1</sup> H NMR spectra of <b>2</b> .....                          | S5-S6 |
| Figure S8. Infrared spectrum of <b>2</b> .....                                           | S6    |
| Figure S9. UV-Vis spectrum (46 μM) of <b>2</b> .....                                     | S7    |
| 3. Characterization data for complex <b>3</b> .....                                      | S7    |
| Figure S10. <sup>1</sup> H NMR spectrum of <b>3</b> .....                                | S7    |
| Figure S11. <sup>119</sup> Sn NMR spectrum and acquisition parameters for <b>3</b> ..... | S8    |
| Figure S12. Infrared spectrum of <b>3</b> .....                                          | S9    |
| Figure S13. UV-Vis spectrum (53 μM) of <b>3</b> .....                                    | S9    |
| 4. Characterization data for complex <b>4</b> .....                                      | S10   |
| Figure S14. <sup>1</sup> H NMR spectrum of <b>4</b> .....                                | S10   |

|                                                                                                    |     |
|----------------------------------------------------------------------------------------------------|-----|
| Figure S15. Infrared spectrum of <b>4</b> .....                                                    | S10 |
| Figure S16. UV-Vis spectrum (50 $\mu$ M) of <b>4</b> .....                                         | S11 |
| Figure S17. Variable temperature UV-Vis spectrum (250 $\mu$ M) of <b>4</b> .....                   | S11 |
| 5. X-Ray Crystallographic data for <b>1-4</b> .....                                                | S12 |
| Table S1. Crystal data and structure refinement for <b>1-4</b> .....                               | S12 |
| Figure S18. Electron density map for <b>1</b> and comments.....                                    | S13 |
| Figure S19. Line drawing demonstrating the connectivity of the core atoms in compound <b>1</b> ... | S14 |

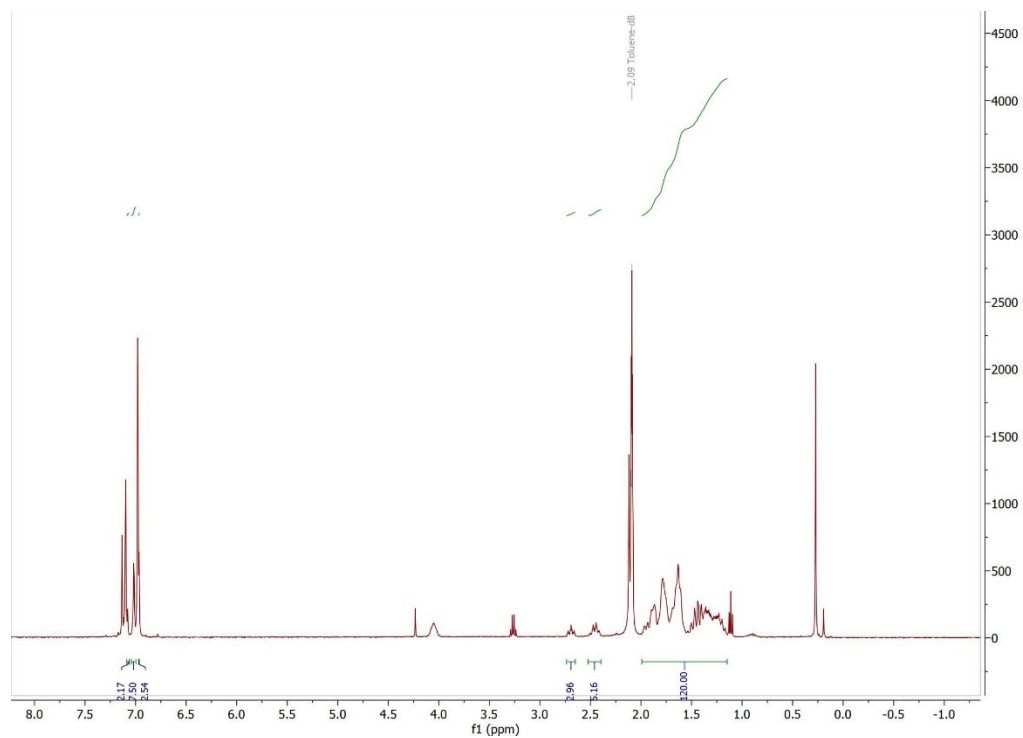

Figure S1.  $^1\text{H}$  NMR spectrum (25  $^\circ\text{C}$ ,  $\text{C}_7\text{D}_8$ , 400 MHz) of  $[\text{Ge}_6(\mu_3\text{-O})_4(\mu_2\text{-OC}_6\text{H}_2\text{-2,4,6-Cy}_3)_4](\text{NH}_3)_{0.5}$  (**1**).

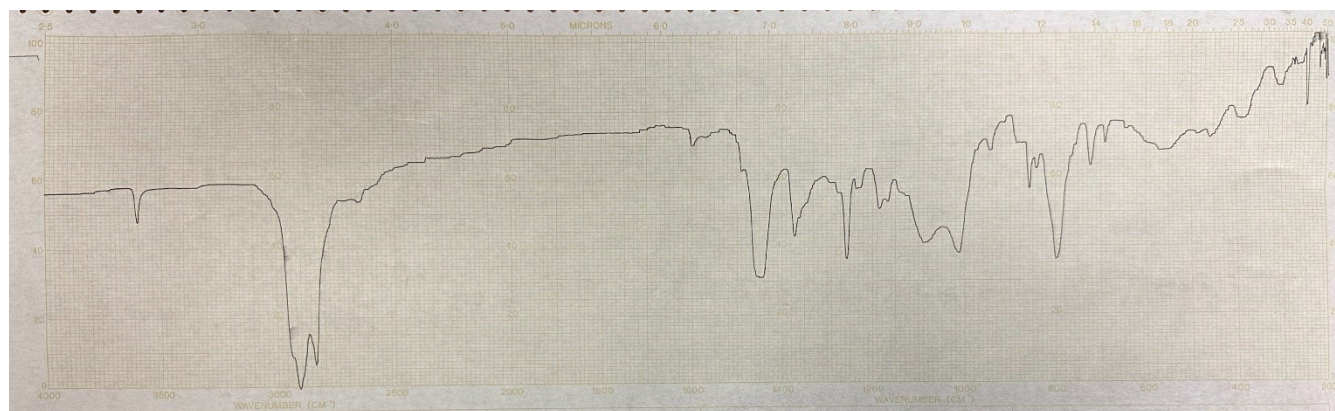

Figure S2. Infrared spectrum of  $[\text{Ge}_6(\mu_3\text{-O})_4(\mu_2\text{-OC}_6\text{H}_2\text{-2,4,6-Cy}_3)_4](\text{NH}_3)_{0.5}$  (**1**).

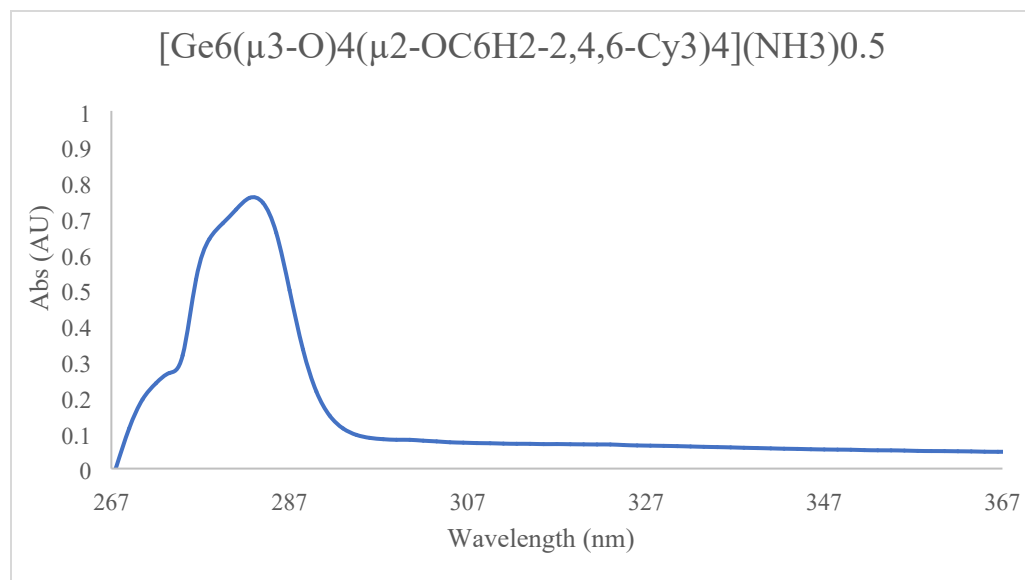

Figure S3. UV-Vis spectrum (73  $\mu\text{M}$ , toluene) of  $[\text{Ge}_6(\mu_3\text{-O})_4(\mu_2\text{-OC}_6\text{H}_2\text{-2,4,6-Cy}_3)_4](\text{NH}_3)_{0.5}$  (**1**).

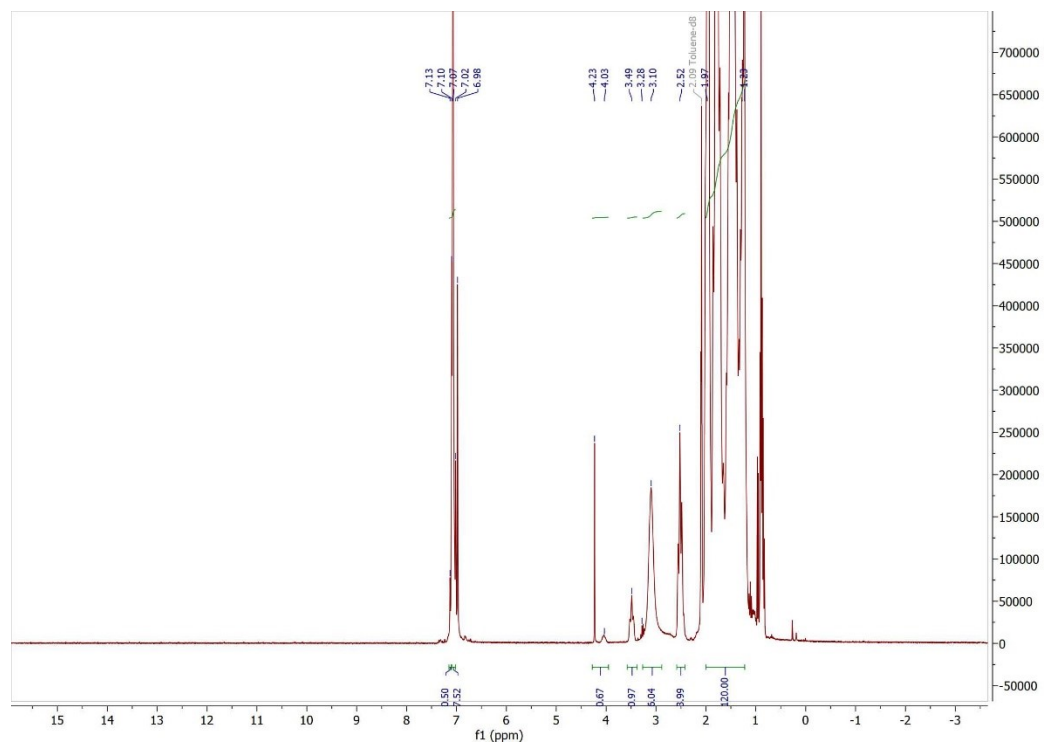

Figure S4.  $^1\text{H}$  NMR spectrum (25  $^\circ\text{C}$ ,  $\text{C}_7\text{D}_8$ , 400 MHz) of  $[\text{Ge}(\text{OC}_6\text{H}_2\text{-2,4,6-Cy}_3)_2]_2$  (**2**).

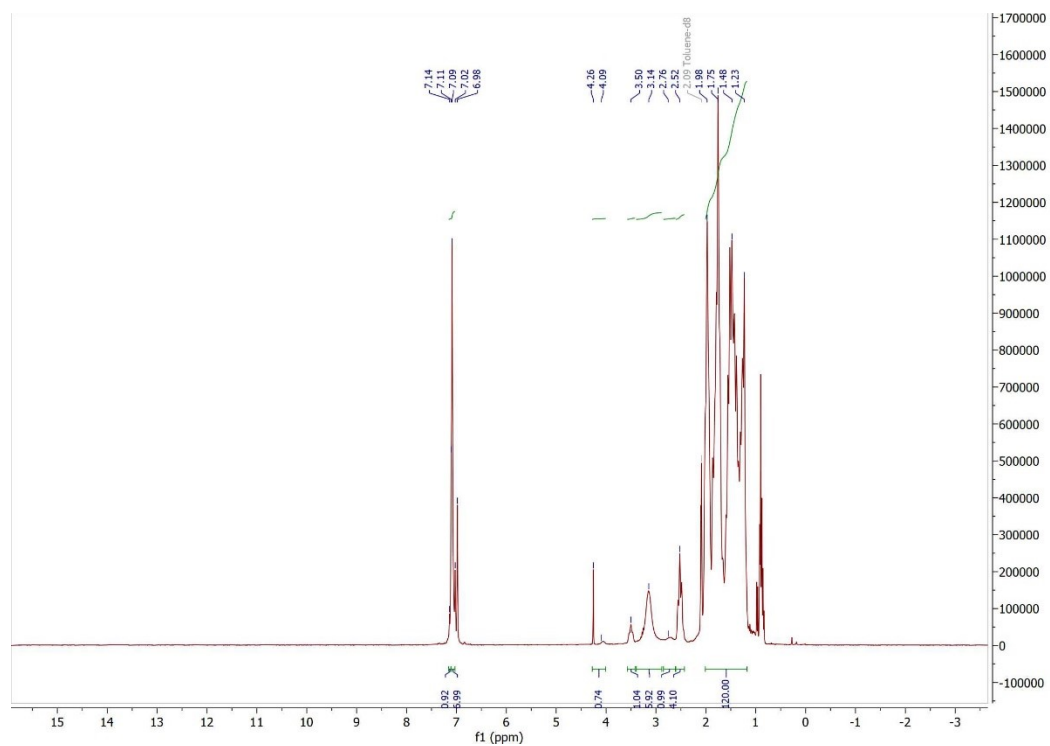

Figure S5.  $^1\text{H}$  NMR spectrum (11 °C,  $\text{C}_7\text{D}_8$ , 300 MHz) of  $[\text{Ge}(\text{OC}_6\text{H}_2\text{-}2,4,6\text{-Cy}_3)_2]_2$  (**2**).

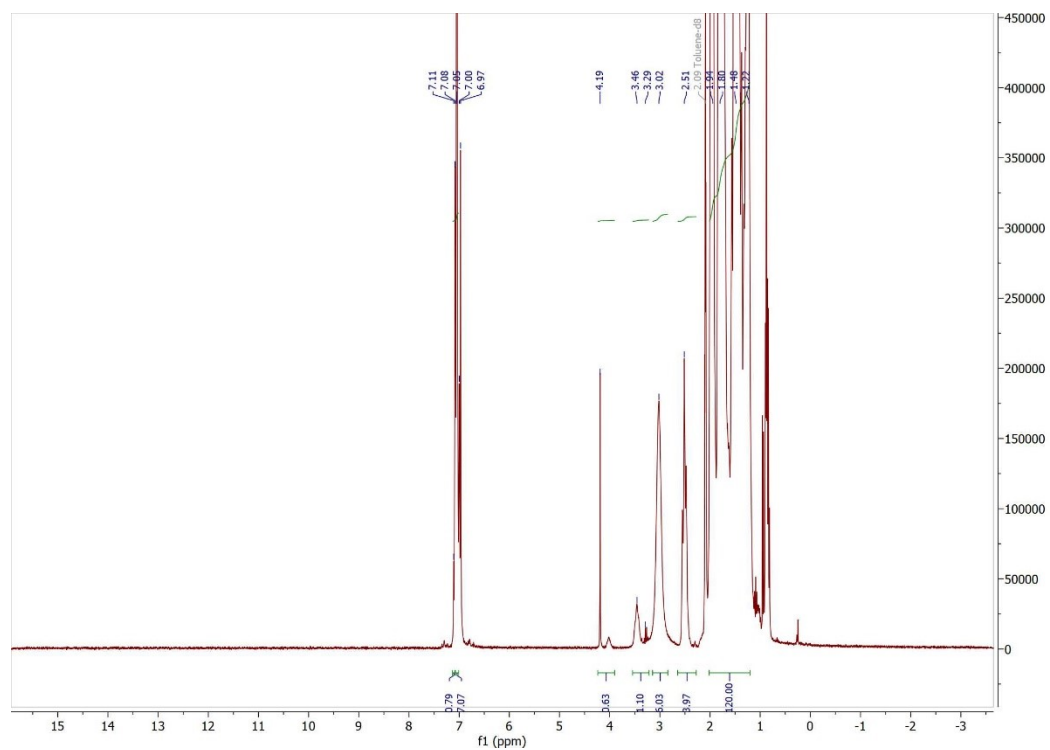

Figure S6.  $^1\text{H}$  NMR spectrum (55 °C,  $\text{C}_7\text{D}_8$ , 300 MHz) of  $[\text{Ge}(\text{OC}_6\text{H}_2\text{-}2,4,6\text{-Cy}_3)_2]_2$  (**2**).

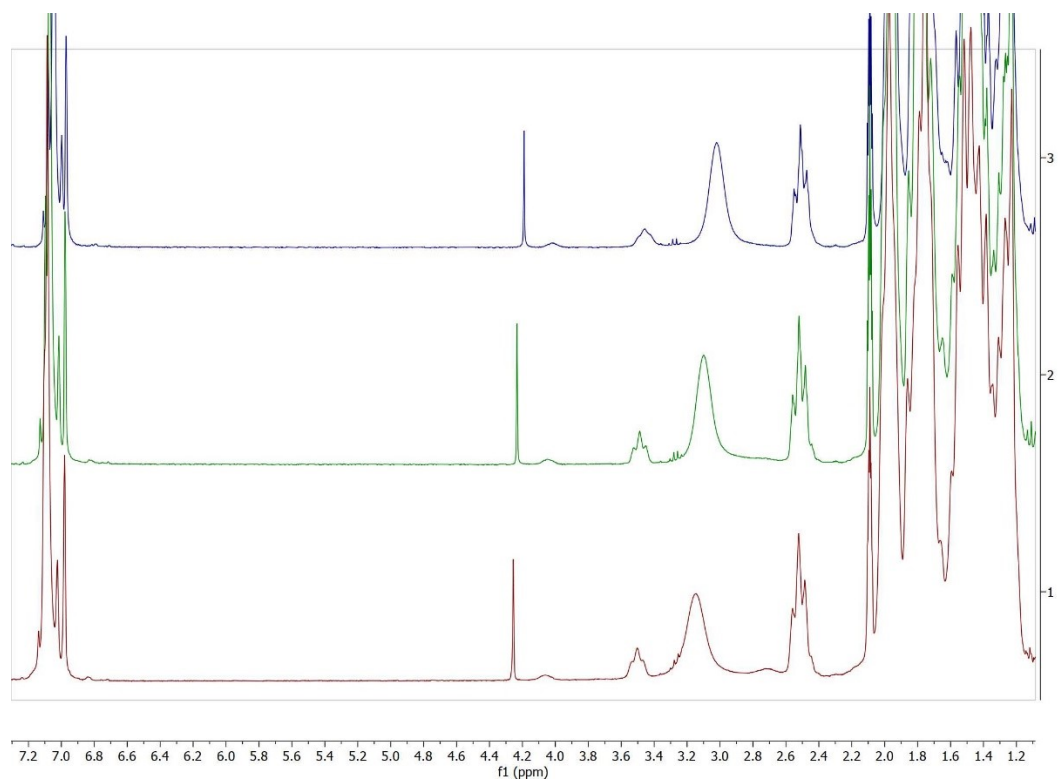

Figure S7. Stacked Variable temperature <sup>1</sup>H NMR spectra (11° {bottom}, 25° {middle}, 55 °C {top}, C<sub>7</sub>D<sub>8</sub>, 300 MHz) of  $[\text{Ge}(\text{OC}_6\text{H}_2\text{-}2,4,6\text{-Cy}_3)_2]_2$  (**2**).

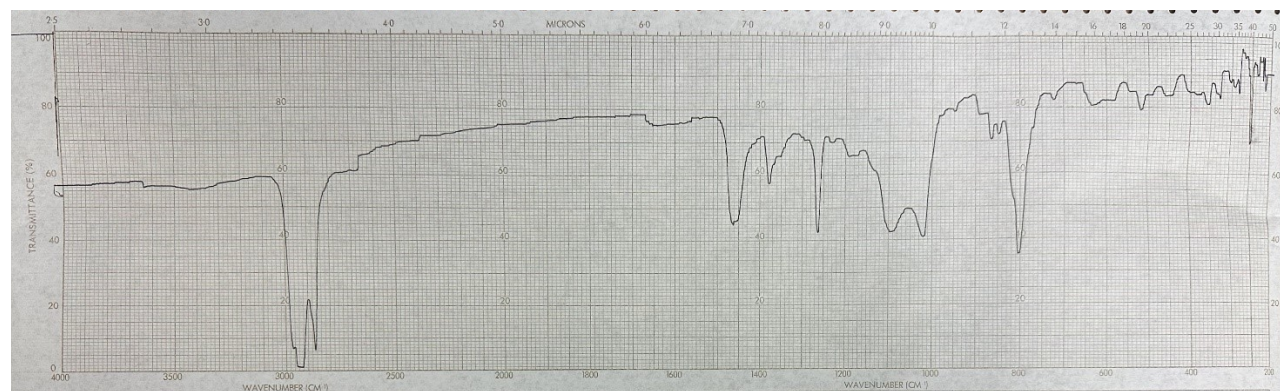

Figure S8. Infrared spectrum (Nujol) of  $[\text{Ge}(\text{OC}_6\text{H}_2\text{-}2,4,6\text{-Cy}_3)_2]_2$  (**2**).

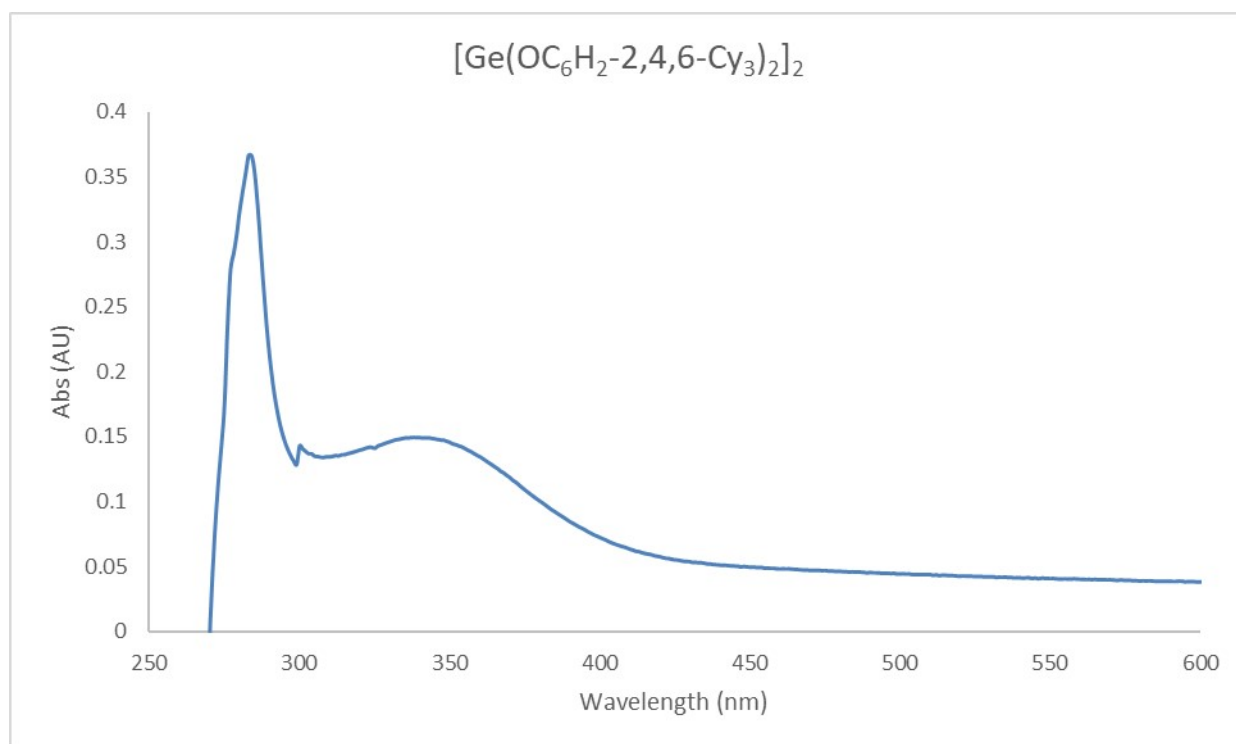

Figure S9. UV-Vis spectrum (46  $\mu\text{M}$ , toluene) of  $[\text{Ge}(\text{OC}_6\text{H}_2\text{-}2,4,6\text{-Cy}_3)_2]_2$  (**2**).

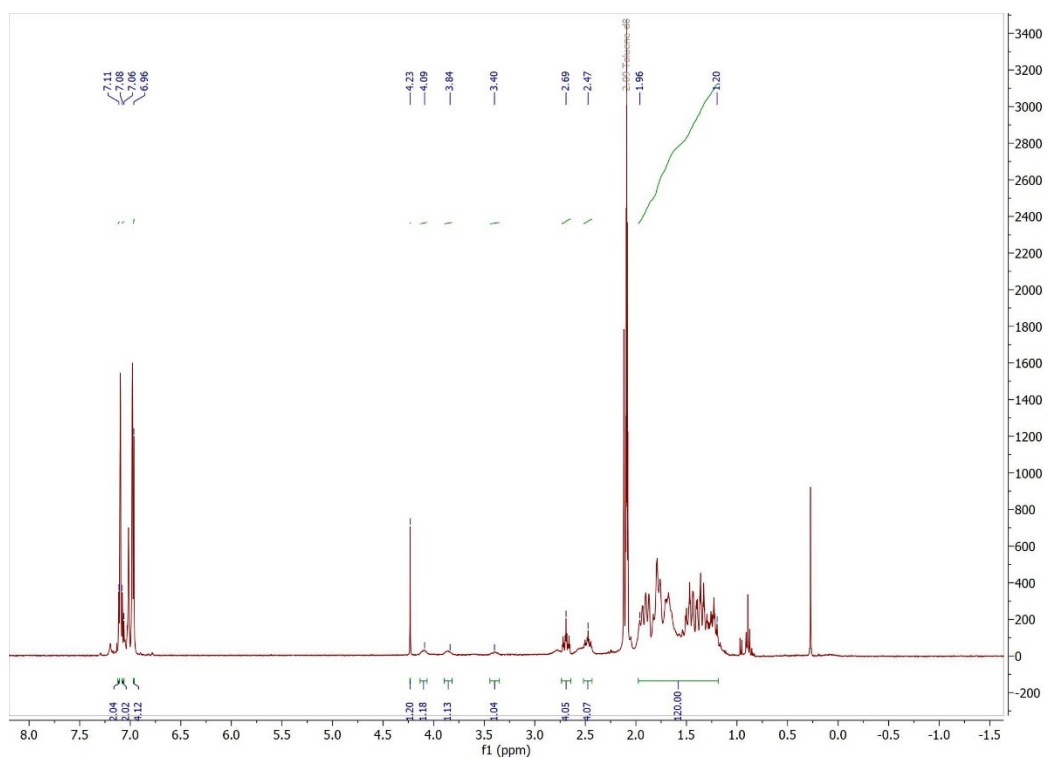

Figure S10.  $^1\text{H}$  NMR spectrum (25 °C,  $\text{C}_7\text{D}_8$ , 400 MHz) of  $[\text{Sn}(\text{OC}_6\text{H}_2\text{-2,4,6-Cy}_3)_2]_2$  (**3**).

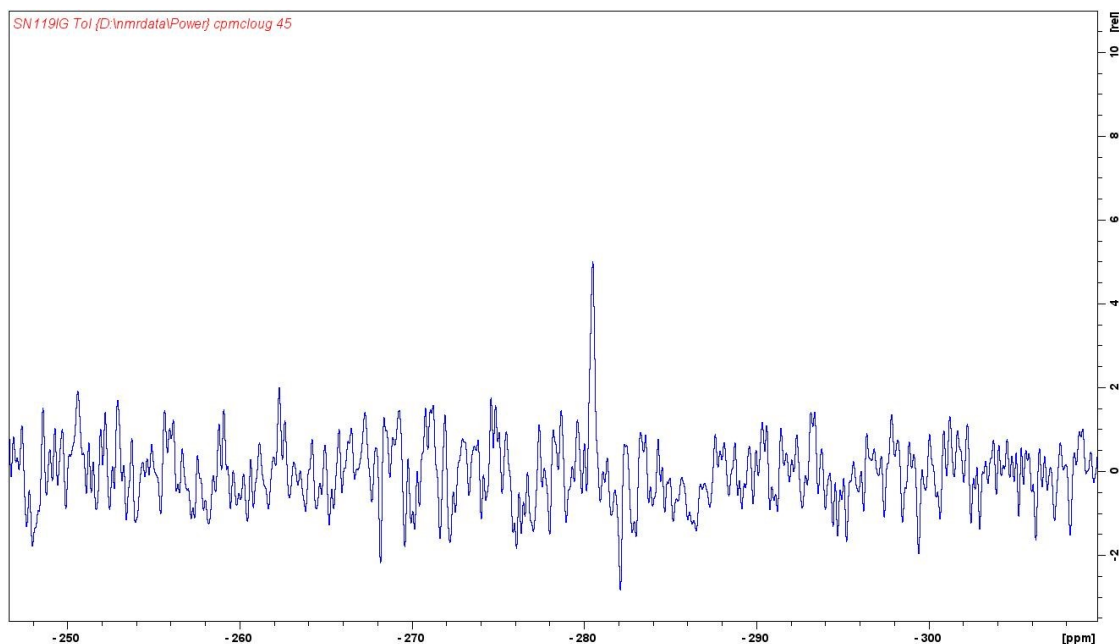

Figure S11.  $^{119}\text{Sn}$  NMR spectrum\* (25 °C,  $\text{C}_7\text{D}_8$ , 149.07 MHz) of  $[\text{Sn}(\text{OC}_6\text{H}_2\text{-2,4,6-Cy}_3)_2]_2$  (**3**).

\*The initial acquisition parameters included a dwell time of 5 ms, recycle delay of 10 ms, and 16,384 FIDs were averaged for an acquisition time of 9.8 ms and a repetition time of 20 ms (total experimental time 15 minutes). The initial 10 ms acquisition time was too short from the long  $T_2^*$  of the narrow resonance and resulted in truncation of the signal leading to characteristic sinc wiggles and broadening of the  $^{119}\text{Sn}$  resonance (FWHM=65 Hz). The new acquisition parameters include 24,576 FIDs, dwell time of 16  $\mu\text{s}$ , recycle delay of 500 ms for an acquisition time of 260 ms and a recycle delay of 760 ms (total experimental time 5 hours). The FWHM of this peak is narrower (38.7 Hz) indicating that the reviewer was correct and that the parameters could be optimized.

Making the initial assumption that  $T_2^*=T_2=T_1$  that is generally valid in liquid state NMR, we can estimate from the linewidth that the  $T_1$  of the sample is  $\sim 8$  ms, indicating that the initial set of parameters was collecting only  $1 \cdot T_2$  which gives the expected truncation wiggles in the spectrum. However, with the  $T_1$  being very short and only using a 30-degree tip angle, good SNR could be obtained with a fast recycle delay. Fundamentally, the information obtained in both spectra are the same with a single chemical shift at -280.5 ppm. The low signal to noise ratio is easily explained by the low sample concentration due to solubility and the relatively high molecular weight and prevents additional information such as isotopologues from being observed.



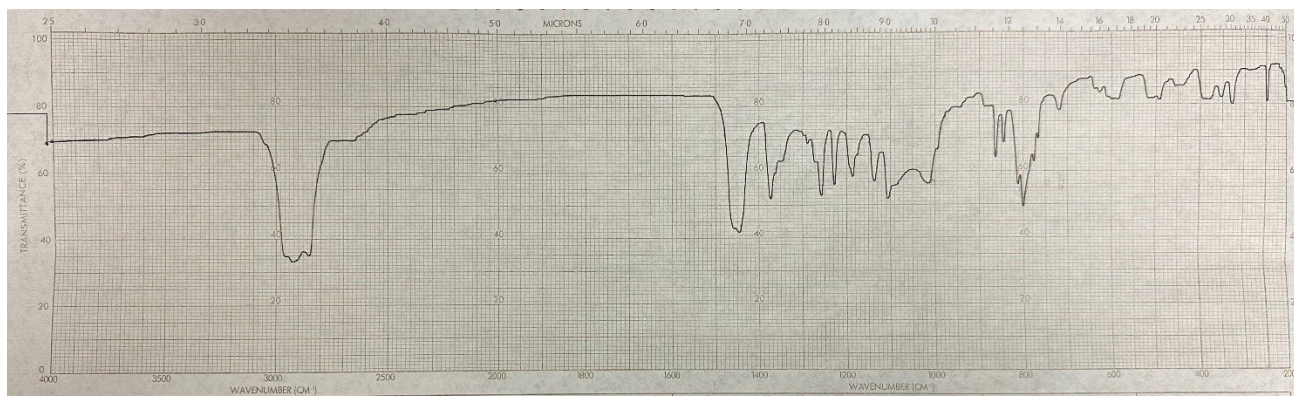

Figure S12. Infrared spectrum (Nujol) of  $[\text{Sn}(\text{OC}_6\text{H}_2\text{-}2,4,6\text{-Cy}_3)_2]_2$  (**3**).

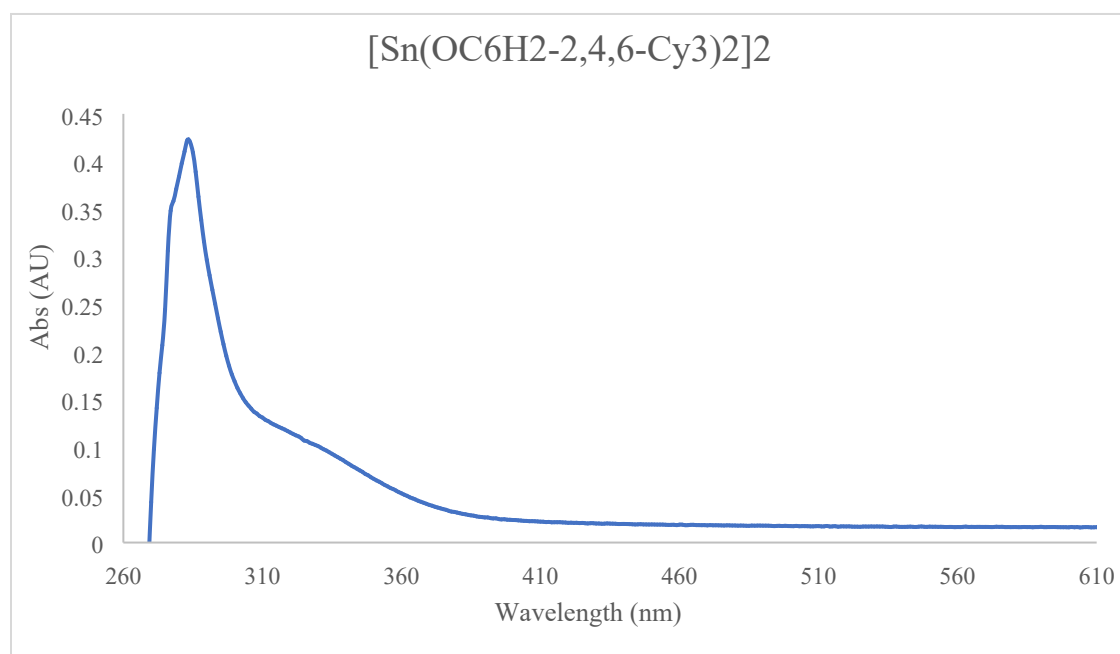

Figure S13. UV-Vis spectrum (53  $\mu\text{M}$ , toluene) of  $[\text{Sn}(\text{OC}_6\text{H}_2\text{-}2,4,6\text{-Cy}_3)_2]_2$  (**3**).

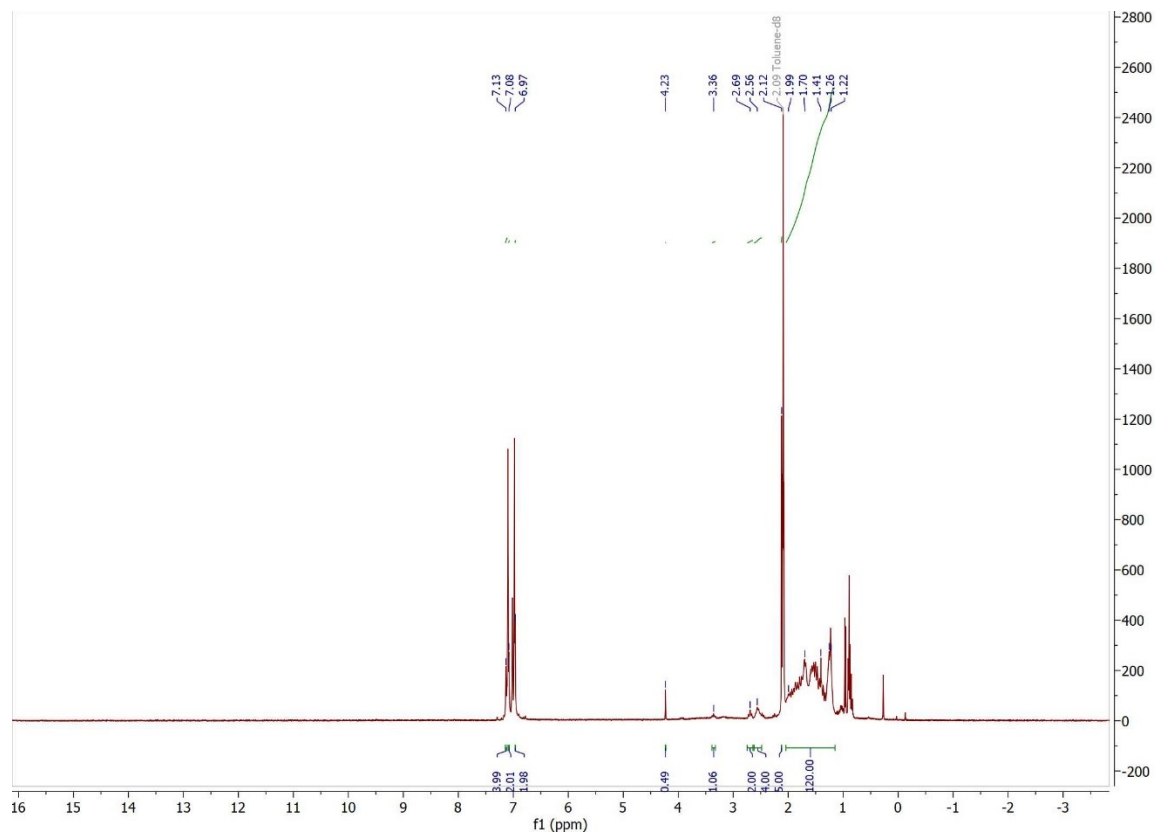

Figure S14.  $^1\text{H}$  NMR spectrum (25 °C,  $\text{C}_7\text{D}_8$ , 400 MHz) of  $[\text{Pb}(\text{OC}_6\text{H}_2\text{-}2,4,6\text{-Cy}_3)_2]_2$  (**4**).

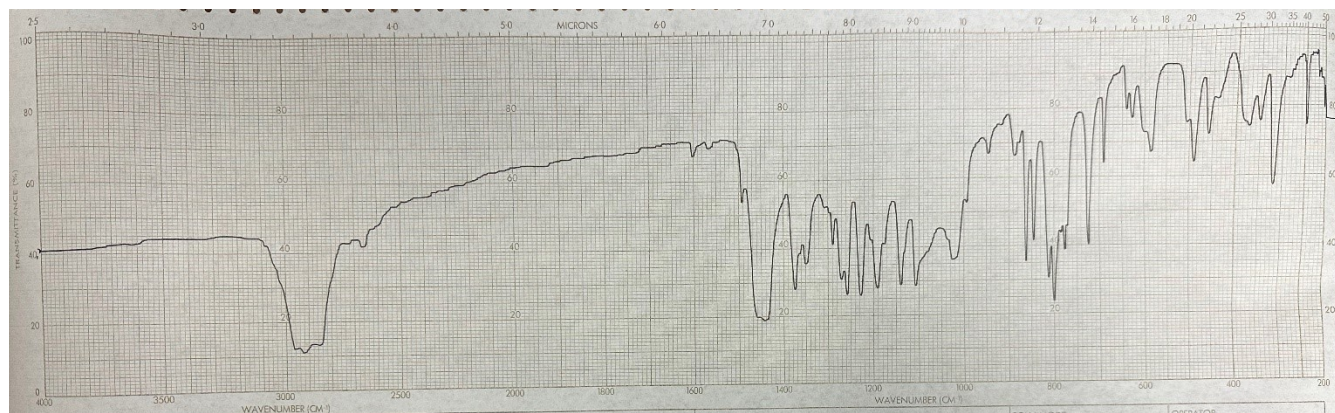

Figure S15. Infrared spectrum (Nujol) of  $[\text{Pb}(\text{OC}_6\text{H}_2\text{-}2,4,6\text{-Cy}_3)_2]_2$  (**4**).

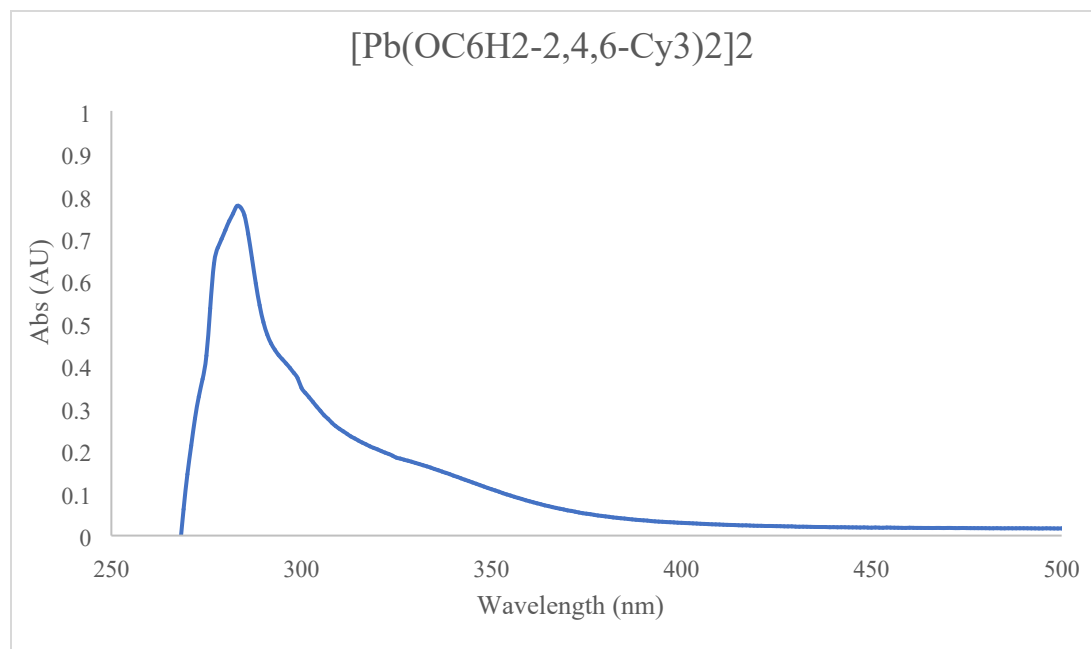

Figure S16. UV-Vis spectrum (25 °C, 50  $\mu\text{M}$ , toluene) of  $[\text{Pb}(\text{OC}_6\text{H}_2\text{-}2,4,6\text{-Cy}_3)_2]_2$  (**4**).

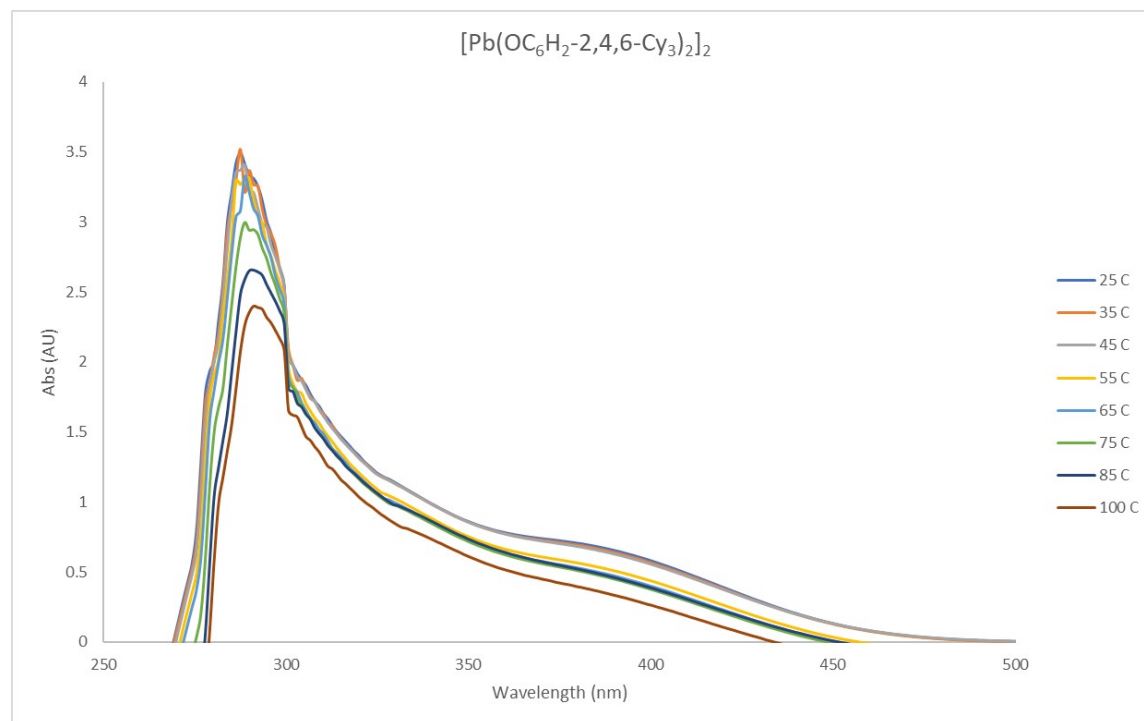

Figure S17. Variable temperature UV-Vis spectra (250  $\mu\text{M}$ , toluene) of  $[\text{Pb}(\text{OC}_6\text{H}_2\text{-}2,4,6\text{-Cy}_3)_2]_2$  (**4**).

Table S1. Crystal data and structure refinement for **1-4**

|                                      | <b>1</b>                                                                              | <b>2</b>                                                        | <b>3</b>                                                         | <b>4</b>                                                        |
|--------------------------------------|---------------------------------------------------------------------------------------|-----------------------------------------------------------------|------------------------------------------------------------------|-----------------------------------------------------------------|
| Empirical formula                    | C <sub>124</sub> H <sub>173.50</sub> Ge <sub>6</sub> N <sub>0.50</sub> O <sub>8</sub> | C <sub>96</sub> H <sub>140</sub> Ge <sub>2</sub> O <sub>4</sub> | C <sub>110</sub> H <sub>156</sub> O <sub>4</sub> Sn <sub>2</sub> | C <sub>96</sub> H <sub>140</sub> O <sub>4</sub> Pb <sub>2</sub> |
| Formula weight                       | 2234.66                                                                               | 1503.31                                                         | 1779.72                                                          | 1772.45                                                         |
| Temperature                          | 150(2) K                                                                              | 100(2) K                                                        | 90(2) K                                                          | 90(2) K                                                         |
| Wavelength                           | 0.71073 Å                                                                             | 0.71073 Å                                                       | 0.71073 Å                                                        | 0.71073 Å                                                       |
| Crystal system                       | Monoclinic                                                                            | Monoclinic                                                      | Monoclinic                                                       | Monoclinic                                                      |
| Space group                          | C2/c                                                                                  | P2 <sub>1</sub> /c                                              | P2 <sub>1</sub>                                                  | P2 <sub>1</sub> /n                                              |
| Unit cell dimensions                 | a = 28.917(4) Å                                                                       | a = 19.3073(12) Å                                               | a = 12.1851(2) Å                                                 | a = 18.4668(8) Å                                                |
|                                      | b = 28.936(4) Å                                                                       | b = 16.9581(11) Å                                               | b = 26.1606(4) Å                                                 | b = 16.8063(6) Å                                                |
|                                      | c = 29.722(4) Å                                                                       | c = 31.157(2) Å                                                 | c = 15.8166(3) Å                                                 | c = 19.1231(8) Å                                                |
|                                      | a = 90°.                                                                              | a = 90°.                                                        | a = 90°.                                                         | a = 90°.                                                        |
|                                      | b = 108.188(4)°.                                                                      | b = 100.2858(16)°.                                              | b = 107.6338(9)°.                                                | b = 117.133(2)°.                                                |
|                                      | g = 90°.                                                                              | g = 90°.                                                        | g = 90°.                                                         | g = 90°.                                                        |
| Volume                               | 23627(5) Å <sup>3</sup>                                                               | 10037.4(11) Å <sup>3</sup>                                      | 4804.94(14) Å <sup>3</sup>                                       | 5281.9(4) Å <sup>3</sup>                                        |
| Z                                    | 8                                                                                     | 4                                                               | 2                                                                | 2                                                               |
| Density (calculated)                 | 1.256 Mg/m <sup>3</sup>                                                               | 0.995 Mg/m <sup>3</sup>                                         | 1.230 Mg/m <sup>3</sup>                                          | 1.114 Mg/m <sup>3</sup>                                         |
| Absorption coefficient               | 1.560 mm <sup>-1</sup>                                                                | 0.641 mm <sup>-1</sup>                                          | 0.571 mm <sup>-1</sup>                                           | 3.223 mm <sup>-1</sup>                                          |
| F(000)                               | 9416                                                                                  | 3248                                                            | 1896                                                             | 1824                                                            |
| Crystal size                         | 0.206 x 0.185 x 0.030 mm <sup>3</sup>                                                 | 0.380 x 0.186 x 0.080 mm <sup>3</sup>                           | 0.340 x 0.201 x 0.079 mm <sup>3</sup>                            | 0.457 x 0.272 x 0.190 mm <sup>3</sup>                           |
| Crystal color and habit              | Colorless Rectangular                                                                 | Colourless Rectangular                                          | Colorless Rectangular                                            | Yellow Rectangular Block                                        |
| Diffractometer                       | Bruker Photon2 CMOS                                                                   | Bruker Photon2 CMOS                                             | Bruker APEX-II CCD                                               | Bruker APEX-II CCD                                              |
| Theta range for data collection      | 1.948 to 25.551°.                                                                     | 1.072 to 27.510°.                                               | 1.557 to 27.544°.                                                | 1.733 to 25.488°.                                               |
| Index ranges                         | -34<=h<=34, -34<=k<=34, -35<=l<=35                                                    | -25<=h<=25, -22<=k<=22, -40<=l<=40                              | -15<=h<=15, -33<=k<=33, -20<=l<=20                               | -22<=h<=22, -20<=k<=20, -23<=l<=23                              |
| Reflections collected                | 85260                                                                                 | 88299                                                           | 37967                                                            | 33242                                                           |
| Independent reflections              | 21934 [R(int) = 0.0997]                                                               | 23068 [R(int) = 0.0269]                                         | 21907 [R(int) = 0.0479]                                          | 9776 [R(int) = 0.0484]                                          |
| Observed reflections (I > 2sigma(I)) | 16435                                                                                 | 17986                                                           | 17678                                                            | 6542                                                            |
| Completeness to theta = 25.242°      | 99.90%                                                                                | 100.00%                                                         | 100.00%                                                          | 99.90%                                                          |
| Absorption correction                | Semi-empirical from equivalents                                                       | Semi-empirical from equivalents                                 | Semi-empirical from equivalents                                  | Semi-empirical from equivalents                                 |
| Max. and min. transmission           | 0.4867 and 0.4279                                                                     | 0.8832 and 0.8432                                               | 0.9143 and 0.8565                                                | 0.4928 and 0.3730                                               |
| Solution method                      | SHELXT (Sheldrick, 2015) Acta Cryst., A71, 3-8                                        | SHELXT (Sheldrick, 2015) Acta Cryst., A71, 3-8                  | SHELXT (Sheldrick, 2015) Acta Cryst., A71, 3-8                   | SHELXT (Sheldrick, 2015) Acta Cryst., A71, 3-8                  |

| Refinement method                    | SHELXL-2018/3<br>(Sheldrick, 2018)<br>Full-matrix least-<br>squares on F2 |
|--------------------------------------|---------------------------------------------------------------------------|---------------------------------------------------------------------------|---------------------------------------------------------------------------|---------------------------------------------------------------------------|
| Data / restraints / parameters       | 21934 / 403 / 1427                                                        | 23068 / 0 / 919                                                           | 21907 / 1 / 1036                                                          | 9776 / 101 / 544                                                          |
| Goodness-of-fit on F2                | 1.042                                                                     | 1.044                                                                     | 0.995                                                                     | 1.051                                                                     |
| Final R indices [ $I > 2\sigma(I)$ ] | R1 = 0.0737, wR2 =<br>0.2012                                              | R1 = 0.0342, wR2 =<br>0.0846                                              | R1 = 0.0436, wR2 =<br>0.0731                                              | R1 = 0.0466, wR2 =<br>0.1086                                              |
| R indices (all data)                 | R1 = 0.0984, wR2 =<br>0.2234                                              | R1 = 0.0470, wR2 =<br>0.0905                                              | R1 = 0.0623, wR2 =<br>0.0803                                              | R1 = 0.0795, wR2 =<br>0.1254                                              |
| Largest diff. peak and hole          | 2.549 and -0.865<br>e.Å <sup>-3</sup>                                     | 1.006 and -0.480<br>e.Å <sup>-3</sup>                                     | 0.570 and -0.461<br>e.Å <sup>-3</sup>                                     | 1.156 and -0.713<br>e.Å <sup>-3</sup>                                     |

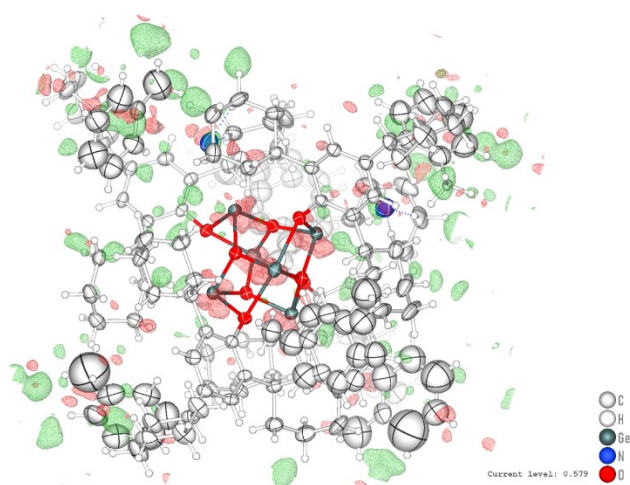

Figure S18. Electron density map for **1** and comments.

There is minimal residual electron density around one of the nitrogen atoms. Many atoms are not seen in residual electron density maps when dealing with light atoms that rotate freely. Hydrogen is the lightest atom and is therefore the most difficult to locate whenever it has any form of unrestricted motion, as it does in the case of compound **1**. We also observe an  $\nu_{\text{N-H}}$  vibrational mode in the IR spectrum of compound **1** confirming the presence of hydrogen atoms around the nitrogen atoms, despite the difficulty in locating them crystallographically.

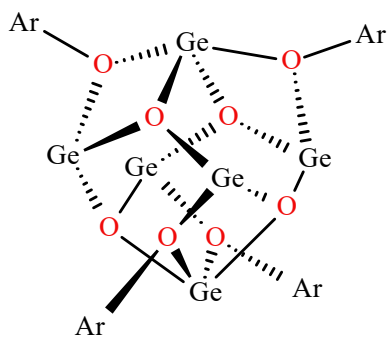

Ar =  $-\text{C}_6\text{H}_2-2,4,6\text{-Cy}_3$  (Cy=Cyclohexyl)

Figure S19. Line drawing demonstrating the connectivity of the core atoms in compound **1**.
